# Supplementary material
Source: PubMed Central journal article supplement (PMC6894186)
Supplement: NIHMS1060947-supplement-1.pdf [file NIHMS1060947-supplement-1.pdf]

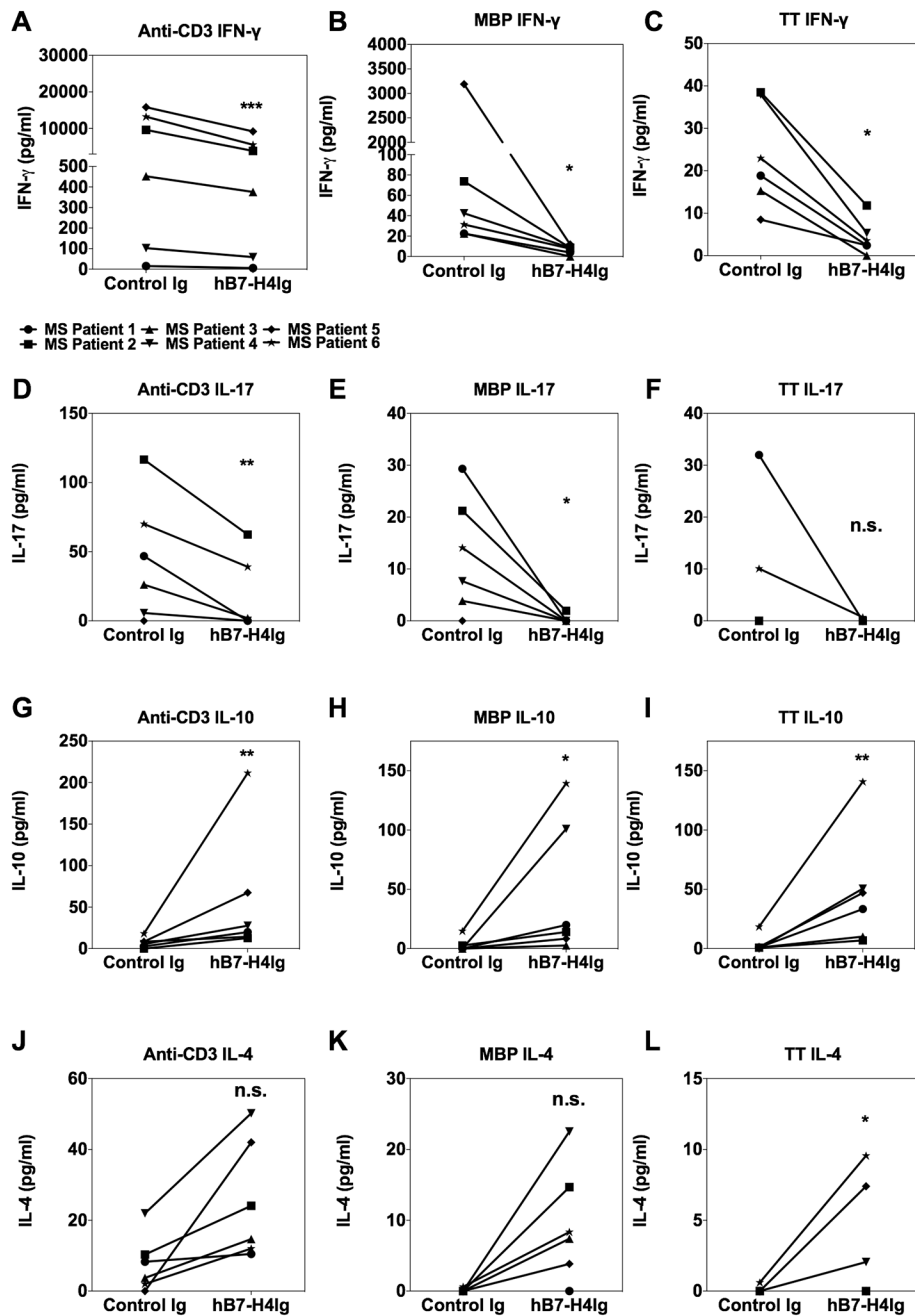

**Supplemental Figure 1.** B7-H4Ig PBMCs were collected from RR-MS patients (n=6), and the cells ( $10^6$ /well in a 96-well plate) were activated for 5 days in the presence of anti-CD3 (0.5 $\mu$ g/ml), MBP<sub>85-96</sub>, or TT<sub>830-843</sub> (10 $\mu$ g/ml) plus Control Ig or hB7-H4Ig (10 $\mu$ g/ml) and the levels of proliferation and secreted cytokines (**A-C**) IFN- $\gamma$ , (**D-F**) IL-17, (**G-I**) IL-10, and (**J-L**) IL-4 were assessed. Asterisks (\*, \*\*, \*\*\*) indicate a statistically significant difference in proliferation and cytokine production by cells from B7-H4Ig treated cultures in comparison to Control Ig,  $p < 0.05$ ,  $< 0.01$ ,  $< 0.001$ , respectively.

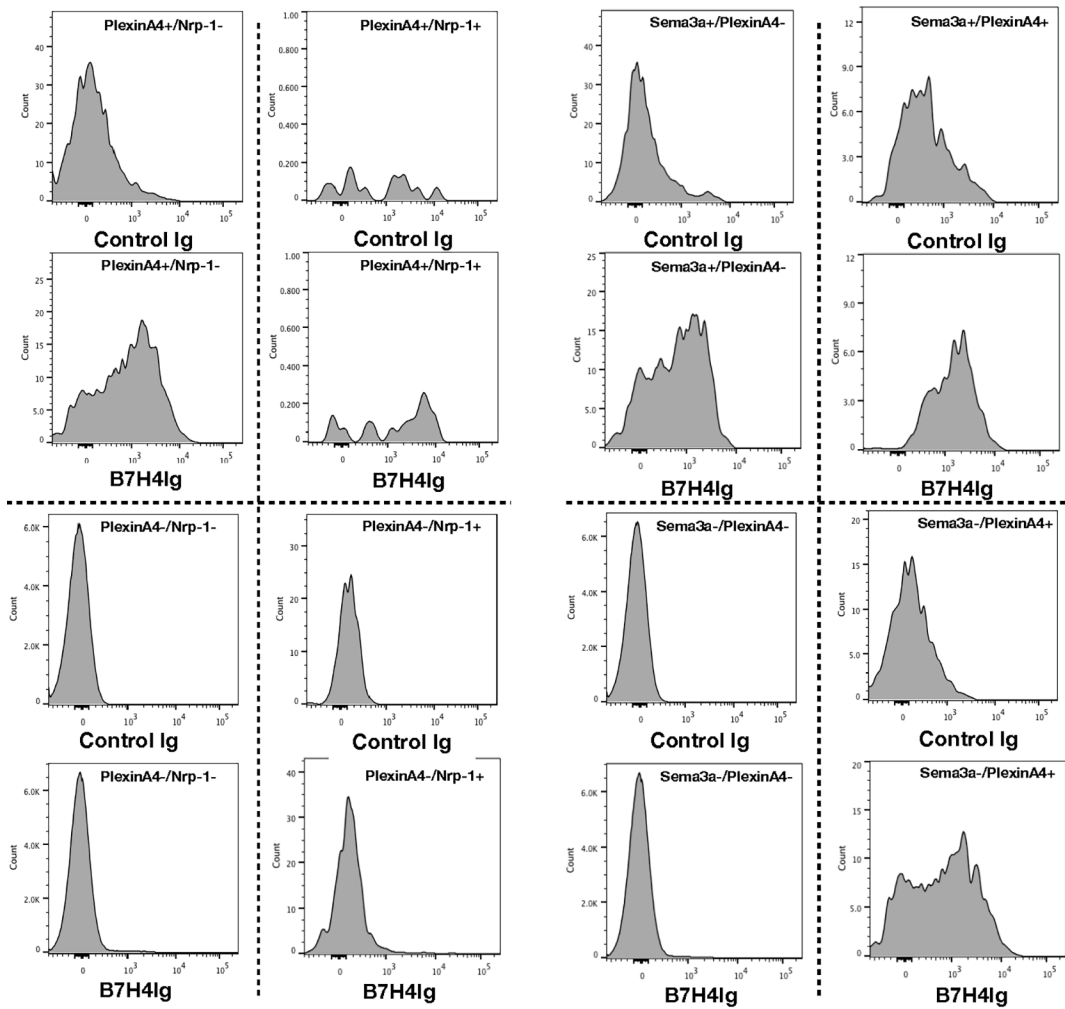

**Supplemental Figure 2. B7-H4Ig binds Sema3a<sup>+</sup> and PlxnA4<sup>+</sup> human CD4<sup>+</sup> T cells.** PBMCs from healthy donors were activated in the presence of anti-CD3 (0.5μg/ml), and on Day +3 of culture the cells were collected and the binding of hB7-H4Ig to Nrp-1, PlxnA4, and Sema3a bearing cells was assessed via FACS. Live, single cell, dump negative (CD11b, CD11c, CD20, and CD8), and CD3/CD4<sup>+</sup> cells were gated into the PlxnA4 vs. Nrp-1 and Sema3a vs. PlxnA4 dot plots. The binding of Control Ig vs. hB7-H4Ig is presented in the respective histograms for each dot-plot quadrant population of cells. One replicate experiment of three is presented.

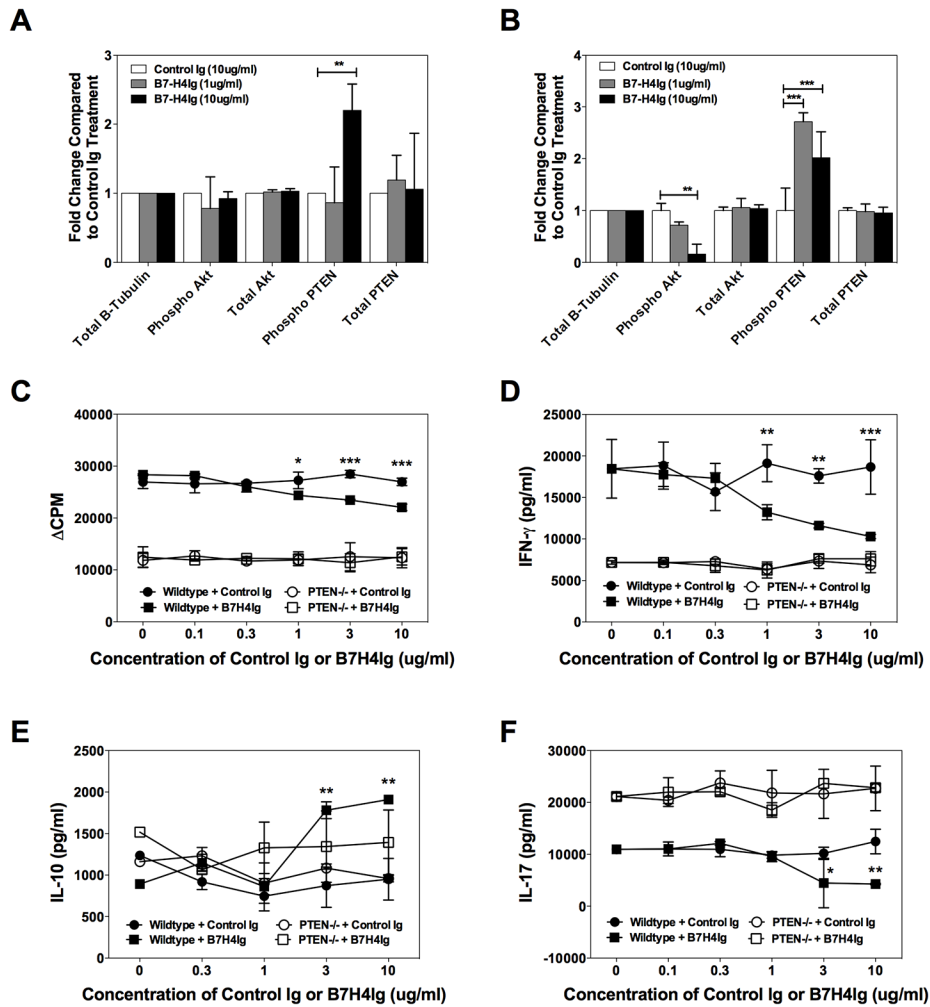

**Supplemental Figure 3. B7-H4Ig treatment induces increased levels of phosphorylated PTEN.** (A) SJL/J mice were primed with PLP<sub>139-151</sub>/CFA. On day +8 post-priming, draining inguinal lymph nodes cells ( $5 \times 10^6$  cells/well in a 24-well plate) were cultured in the presence of PLP<sub>139-151</sub> (10  $\mu$ g/ml) for 3 days. Following culture the cells were collected and re-cultured for 3 h in the presence of plate-bound Control Ig or hB7-H4Ig (1 or 10  $\mu$ g/ml). (B) Naïve CD4<sup>+</sup> T cells from SJL-FoxP3/GFP mice were cultured with plate-bound anti-CD3 (1.0  $\mu$ g/ml) and soluble anti-CD28 (1  $\mu$ g/ml) in induced Treg promoting culture conditions [TGF- $\beta$  (10 ng/ml) plus IL-2 (100 U/ml)] for 3 days. The resultant FoxP3/GFP<sup>+</sup> cells were re-cultured for 3 h with plate-bound anti-CD3 (1  $\mu$ g/ml) in the presence of either plate-bound Control Ig or hB7-H4Ig (1 and 10  $\mu$ g/ml). The cells were collected, lysed, and the level of  $\beta$ -tubulin, total Akt, phosphorylated Akt, total PTEN, and phosphorylated PTEN was assessed via Luminex assay. All values were normalized to  $\beta$ -tubulin, and the normalized values presented as the fold change compared to the Control Ig treated cells. (C-F) Splenocytes ( $0.5 \times 10^6$  cells/well in a 96-well plate) from mice in which PTEN is conditionally knocked out within FoxP3<sup>+</sup> cells (PTEN<sup>fl/fl</sup> × FoxP3<sup>Cre/YFP</sup>) vs. wildtype mice (n=2) were cultured in the presence of anti-CD3 (1  $\mu$ g/ml) plus Control Ig or hB7-H4Ig (0-10  $\mu$ g/ml) for three days and the level of cellular proliferation assessed via (C) tritiated thymidine incorporation, and the secretion of (D) IFN- $\gamma$ , (E) IL-17, and (F) IL-10. One representative experiment of two is presented. Asterisks (\*, \*\*, \*\*\*) indicates a statistically significant alteration in comparison to cells collected from Control Ig treated wells, p < 0.05, 0.01, 0.001 respectively.

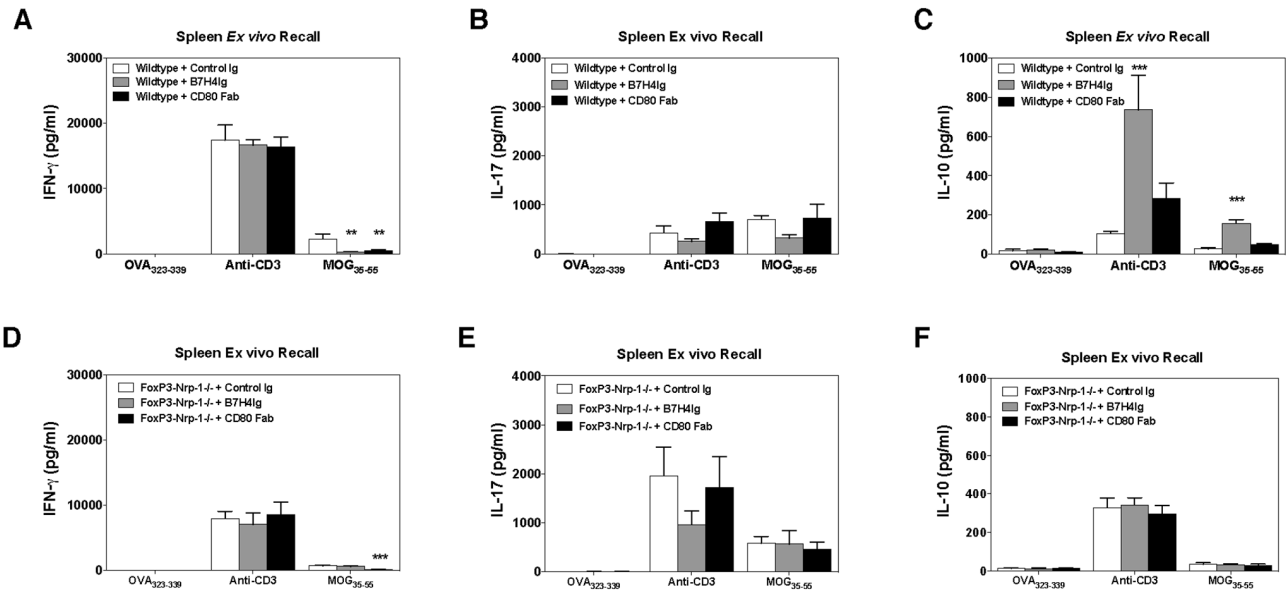

**Supplemental Figure 4. Ex vivo recall responses from B7-H4Ig treated EAE mice.** Splenocytes ( $0.5 \times 10^6$  cells/well in a 96-well plate) from wildtype and Nrp-1<sup>fl/fl</sup>xFoxP3<sup>Cre/YFP</sup> C57BL/6 mice presented in **Fig. 5** were reactivated *ex vivo* in the presence of OVA<sub>323-339</sub> (10 $\mu$ g/ml), anti-CD3 (1 $\mu$ g/ml), or MOG<sub>35-55</sub> (10 $\mu$ g/ml) for 3 days. The levels (**A** and **D**) IFN- $\gamma$ , (**B** and **E**) IL-17, and (**C** and **F**) IL-10 were assessed following activation. Asterisks (\*, \*\*, \*\*\*) indicate a statistically significant difference in cytokine production by cells from hB7-H4Ig or anti-mouse CD80Fab treated mice in comparison to cells collected from Control Ig treated mice,  $p < 0.05, 0.01, 0.001$ , respectively. One representative experiment of two is presented.
